# Supplementary material for: Confirmatory Composite Analysis
Source: PubMed Central journal article supplement (PMC6300521; doi:10.3389/fpsyg.2018.02541), 2018-12-13
Supplement: Data_Sheet_1.pdf [file Data_Sheet_1.pdf]

## Supplementary Material: Confirmatory Composite Analysis

In the following, we provide a brief example on how to estimate and test a composite model in the statistical programming environment R (R Core Team, 2018) using the cSEM package (Rademaker and Schuberth, 2018). In doing so, we use a simulated dataset based on the population model displayed in Figure S1.

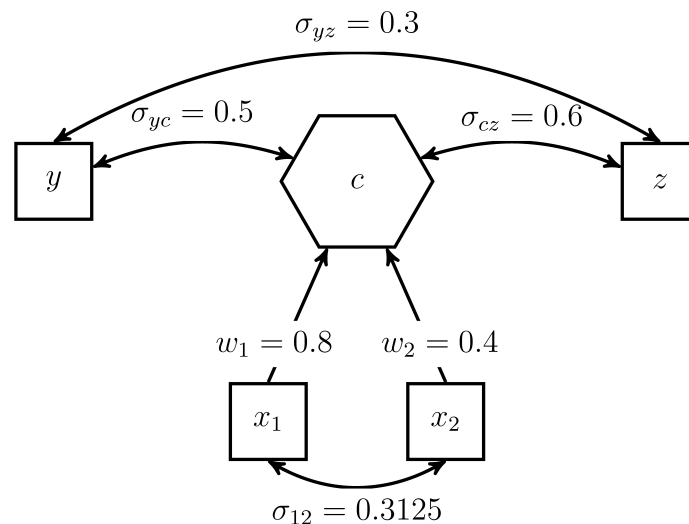

**Figure S1.** Population model

Before the dataset can be generated, we first read in the indicator correlation matrix of the population model.

```

values = scan(n=16)
1 0.3125 0.4625 0.555
0.3125 1 0.325 0.39
0.4625 0.325 1 0.3
0.555 0.39 0.3 1
  
```

```

nam=c('x1', 'x2', 'y', 'z')
Sigma=matrix(values, ncol = 4, dimnames = list(nam,nam))
  
```

Second, we draw a dataset from the multivariate normal distribution using the *mvrnorm* function of the MASS package (Venables and Ripley, 2002). In doing so, we set the empirical argument to TRUE in order to obtain a dataset with a correlation matrix that equals the population correlation matrix of the indicators.

```

data=MASS::mvrnorm(n = 300, mu = rep(0,4),
                   Sigma = Sigma, empirical = TRUE)
  
```

Since the cSEM package is currently not available on CRAN, it needs to be installed directly from Github.

```
# Install the cSEM package (currently under development)
devtools::install_github("M-E-Rademaker/cSEM")
library(cSEM)
```

In the next step, the model is defined in *lavaan* syntax (Rosseel, 2012). In doing so, the observable variables *y* and *z* are specified as single-indicator composites.

```
# Specification of the model
model='
C <~ x1 + x2
Y <~ y
Z <~ z
Y~C
Z~C
'
```

Finally, the model is estimated and its fit is assessed. Unsurprisingly, the estimated model parameters equal their population counterparts, as the function argument `empirical` of the `mvrnorm` function is set to `TRUE`. Consequently, the bootstrap-based test for overall model does not reject the model as it perfectly fits the dataset.

```
# Estimate the model by the csem function using MAXVAR
out = csem(.data = data, .model = model, .approach_weights = 'MAXVAR')

# Weight estimates
> out$Estimates$Weight_estimates
  x1  x2 y z
C 0.8 0.4 0 0
Y 0.0 0.0 1 0
Z 0.0 0.0 0 1

# model-implied correlation matrix of the indicators
> fit(out)
      x1      x2      y      z
x1 1.0000 0.3125 0.4625 0.555
x2 0.3125 1.0000 0.3250 0.390
y  0.4625 0.3250 1.0000 0.300
z  0.5550 0.3900 0.3000 1.000
```

```
# test the overall model fit
testout = testOMF(out, .saturated = TRUE)
```

```
> testout
```

---

```
----- Test for overall model fit based on Dijkstra & Henseler (2015) -----
```

```
Null hypothesis:
```

```

+-----+
|
|   H0: No significant difference between empirical and
|   model-implied indicator covariance matrix.
|
+-----+
```

```
Test statistic and critical value:
```

| Distance measure | Test statistic | Critical value<br>95% |
|------------------|----------------|-----------------------|
| dG               | 0.0000         | 0.0022                |
| SRMR             | 0.0000         | 0.0242                |
| dL               | 0.0000         | 0.0029                |

```
Decision:
```

| Distance measure | Significance level<br>95% |
|------------------|---------------------------|
| dG               | Do not reject             |
| SRMR             | Do not reject             |
| dL               | Do not reject             |

```
Additional information:
```

```
Out of 499 bootstrap replications 499 are admissible.
See ?verify() for what constitutes an inadmissible result.
```

---

## REFERENCES

- R Core Team (2018). *R: A Language and Environment for Statistical Computing*. R Foundation for Statistical Computing, Vienna, Austria
- Rademaker, M. and Schuberth, F. (2018). *cSEM: Composite-Based Structural Equation Modeling*. R package version 0.0.0.9000
- Rosseel, Y. (2012). lavaan: An R package for structural equation modeling. *Journal of Statistical Software* 48, 1–36
- Venables, W. N. and Ripley, B. D. (2002). *Modern Applied Statistics with S* (New York: Springer), 4th edn.
